# Supplementary material for: Assessment of Training in Pancreatology and Biliary Diseases During Gastroenterology Residency: A National Survey Among Young Gastroenterologists
Source: Research Square preprint supplement (doi:10.21203/rs.3.rs-8403681/v1), 2026-01-23
Supplement: Supplementary file 1 [file c7b02b010a88d4d6ce3c208b.docx]

**Supplementary Material 1.** Survey questionnaire on training and self-perceived knowledge in pancreatobiliary diseases.

**Introduction and instructions**

You are invited to participate in an anonymous survey aimed at evaluating training exposure and self-perceived knowledge in pancreatology and biliary diseases among gastroenterology residents and early-career specialists. Participation is voluntary, and all responses will be treated confidentially. The estimated completion time is approximately 10 minutes.

By completing and submitting this questionnaire, you indicate your informed consent to participate in this study.

**Section 1. Demographic and professional characteristics**

1. Age (years): ____

2. Sex:

* Female

* Male

* Prefer not to say

3. Current professional status:

* Final-year gastroenterology resident

* Certified gastroenterology specialist

4. Year of completion of gastroenterology residency: ____

5. Region where residency training was completed:

* [List of Spanish regions]

**Section 2. Training environment and clinical exposure**

6. Type of hospital where residency was completed:

* Tertiary referral hospital

* Secondary-level hospital

7. Availability at your centre of:

* A dedicated pancreatology specialist (Yes / No)

* A dedicated biliary diseases specialist (Yes / No)

8. Approximate number of patients with pancreatobiliary diseases assessed during residency:

* <50

* 50–100

* 101–150

* > 150

9. Which department was primarily responsible for the management of the following conditions at your centre?

* Biliary acute pancreatitis

* Alcohol-related acute pancreatitis

* Acute calculous cholecystitis

* Acute cholangitis

* Biliary colic

(Options for each: Gastroenterology / General surgery / Shared / Other)

**Section 3. Educational activities and advanced training**

10. Was a multidisciplinary pancreatobiliary committee available at your hospital?

* Yes / No

11. Attendance to multidisciplinary biliopancreatic committee (at least 10 times)?

* Yes / No

12. Did you participate in a dedicated pancreatobiliary outpatient clinic during residency?

*No outpatient clinics

*< 5 days

*5-20 days

*> 20 days

13. Number of formal teaching sessions on pancreatology or biliary diseases received during residency:

* 0–1

* 2–4

* ≥5

14. Were your competencies in pancreatobiliary diseases formally evaluated during residency?

* Yes / No

15. Number of pancreatobiliary-related research projects you participated in:

* 0–1

* 2–3

* > 3

16. Did you complete an external rotation specifically focused on pancreatology?

* Yes / No

17. During residency, did you have a particular interest in:

* Pancreatology (Yes / No)

* Biliary diseases (Yes / No)

* Advanced pancreatobiliary endoscopy (Yes / No)

18. Were you aware during residency of any of the following training initiatives?

* Spanish Association of Pancreatology (AESPANC) Residents’ Course

* United European Gastroenterology (UEG) pancreatology-related courses or masterclasses

* Spanish Association of Gastroenterology (AEG) Bilio-pancreatology Master´s degree

* European pancreatic club (EPC) Pancreas 2000 program

(Yes / No for each)

**Section 4. Self-perceived general knowledge**

19. Please rate your overall self-perceived knowledge of pancreatic diseases on a scale from 0 (no knowledge) to 10 (excellent knowledge).

20. Please rate your overall self-perceived knowledge of biliary diseases on a scale from 0 (no knowledge) to 10 (excellent knowledge).

**Section 5. Self-perceived knowledge of specific conditions**

For each of the following conditions, please rate your level of knowledge using the following scale:

1 = None | 2 = Low | 3 = Moderate | 4 = High | 5 = Very high

Pancreatic diseases (31 items)

 Diagnosis and initial management of AP

 Monitoring, detection and management of organ failure in AP

 Ethiological study of AP

 Management of recurrent AP

 Diagnosis of CP

 Follow−up of CP

 Ethiological study of CP

 Pain management in CP

 Diagnosis and management of exocrine pancreatic insufficiency in CP

 Diagnosis and management of diabetes in CP

 Diagnosis and monitoring of nutritional deficiencies in CP and their consequences (e.g., osteoporosis)

 Diagnosis and management of biliary strictures in CP

 Diagnosis and management of duodenal strictures in CP

 Diagnosis and management of pancreatic duct stones and strictures in CP

 Diagnosis and management of pancreatic space occupying lesion in CP

 Diagnosis and management of local complications

 Diagnosis and management of splanchnic thrombosis

 Diagnosis and management of arterial pseudoaneurysm

 Diagnosis and management of duct disconnection syndrome

 Diagnosis of type 1 or 2 AIP

 Treatment of type 1 or 2 AIP

 Follow−up of AIP

 Treatment of AIP relapses

 Diagnosis, staging, and management of pancreatic adenocarcinoma

 How to correctly inform the patient/family member of pancreatic adenocarcinoma

 Diagnosis, staging, and management of pancreatic neuroendocrine tumors

 Follow−up of high risk individuals (BCRS, Lynch...)

 Differential diagnosis of pancreatic cystic lesions

 Management and follow−up of pancreatic cystic lesions

 Diagnosis, follow−up and treatment of cystic fibrosis

 Others minority pancreatic diseases

Biliary diseases (14 items)

 Diagnosis and management of biliary colic

 Diagnosis and management of acute cholecystitis

 Diagnosis and management of acute cholangitis

 Diagnosis and management of symptomatic choledocholithiasis

 Diagnosis and management of primary sclerosing cholangitis

 Diagnosis and management of sphincter of Oddi dysfunction

 Diagnosis, follow−up, and treatment of choledochal cysts

 Diagnosis and management of other benign biliary tract lesions (intraductal papillary neoplasia, biliary microhamartoma...)

 Diagnosis and management of benign gallbladder lesions (gallbladder polyps, adenomas...)

 Diagnosis, staging, and management of cholangiocarcinoma

 Diagnosis, staging, and management of gallbladder carcinoma

 Diagnosis, staging, and management of ampullary tumors

 Diagnosis and treatment of complications of ERCP

 Diagnosis and treatment of complications of EUS

**Section 6. Open-ended question**

In your opinion, what strategies could improve training in pancreatology and biliary diseases during gastroenterology residency?

(Open text)
