# Supplementary material for: Assessment of Training in Pancreatology and Biliary Diseases During Gastroenterology Residency: A National Survey Among Young Gastroenterologists
Source: Research Square preprint supplement (doi:10.21203/rs.3.rs-8403681/v1), 2026-01-23
Supplement: Supplementary file 2 [file e0a37948e5979bb152e53a99.docx]

|  | **N Valid** | **N (%)** |
| --- | --- | --- |
| **Age** | 216 | 32.3 ± 2.7 |
| **Gender** | 215 |  |
| Female |  | 130 (60.5 %) |
| Male |  | 85 (39.5 %) |
| **Formation status** | 212 |  |
| Specialist |  | 151 (71.2 %) |
| Resident |  | 61 (28.8 %) |
| **Autonomous community** | 213 |  |
| Andalucia |  | 26 (12.2 %) |
| Aragon |  | 27 (12.7 %) |
| Asturias |  | 4 (1.9 %) |
| Canarias |  | 4 (1.9 %) |
| Cantabria |  | 1 (0.5 %) |
| Castilla - La Mancha |  | 7 (3.3 %) |
| Castilla - Leon |  | 11 (5.2 %) |
| Cataluña |  | 27 (12.7 %) |
| Galicia |  | 7 (3.3 %) |
| Baleares |  | 2 (0.9 %) |
| Extremadura |  | 3 (1.4 %) |
| La Rioja |  | 1 (0.5 %) |
| Madrid |  | 51 (23.9 %) |
| Murcia |  | 2 (0.9 %) |
| Navarra |  | 10 (4.7 %) |
| Pais Vasco |  | 12 (5.6 %) |
| Valencia |  | 18 (8.5 %) |

**Supplementary Table 1.** Baseline sample characteristics. N=216.

Data presented as: n (%); mean [Standard deviation]
